# Post-Insemination Selection Dominates Pre-Insemination Selection in Driving Rapid Evolution of Male Competitive Ability

Short Title: Post-Insemination Selection Drives Male Evolution

Katja R. Kasimatis<sup>1,#a\*</sup>, Megan J. Moerdyk-Schauwecker<sup>1</sup>, Ruben Lancaster<sup>1</sup>, Alexander Smith<sup>1</sup>, John H. Willis<sup>1</sup>, and Patrick C. Phillips<sup>1\*</sup>

<sup>1</sup>Institute of Ecology and Evolution, University of Oregon, Eugene, Oregon, United States of American

<sup>#a</sup>Current address: Department of Ecology and Evolutionary Biology, University of Toronto, Toronto, Ontario, Canada

\*Corresponding authors:  
Email: [k.kasimatis@utoronto.ca](mailto:k.kasimatis@utoronto.ca) (KRK)  
Email: [pphil@uoregon.edu](mailto:pphil@uoregon.edu) (PCP)

## Abstract

Sexual reproduction is a complex process that contributes to differences between the sexes and divergence between species. From a male's perspective, sexual selection can optimize reproductive success by acting on the variance in mating success (pre-insemination selection) as well as the variance in fertilization success (post-insemination selection). The balance between pre- and post-insemination selection has not yet been investigated using a strong hypothesis-testing framework that directly quantifies the effects of post-insemination selection on the evolution of reproductive success. Here we use experimental evolution of a uniquely engineered genetic system that allows sperm production to be turned off and on in obligate male-female populations of *Caenorhabditis elegans*. We show that enhanced post-insemination competition increases the efficacy of selection and surpasses pre-insemination sexual selection in driving a polygenic response in male reproductive success. We find that after 30 generations post-insemination selection increased male reproductive success by an average of 5- to 7-fold. Contrary to expectation, enhanced pre-insemination competition hindered selection and slowed the rate of evolution. Furthermore, we found that post-insemination selection resulted in a strong polygenic response at the whole-genome level. Our results demonstrate that post-insemination sexual selection plays a critical role in the rapid optimization of male reproductive fitness. Therefore, explicit consideration should be given to post-insemination dynamics when considering the population effects of sexual selection.

## Introduction

Sexual selection drives the evolution of some of the most remarkable phenotypes observed in nature. Interest in these flashy phenotypes has led to a focus on studying pre-insemination reproductive dynamics, such as male-male competition and female choice [1]. However, in animals with internal fertilization, reproduction is more complex and requires a series of interactions within and between the sexes to produce a viable offspring. From a male's perspective, total reproductive success can be partitioned into successfully winning a mating event and then successfully winning a fertilization event. Therefore, sexual selection has the potential to act on both the variance in mating success and the variance in fertilization success (also referred to as gametic selection [2,3]). We do not know if selection during these

reproductive phases interacts in an additive, antagonistic, or synergistic manner to optimize total male reproductive success. Understanding this balance is critical not only for quantifying male reproductive fitness within a generation, but also for understanding how sexual selection shapes the evolution of reproductive success over time. Such processes are critical for relating the role of sexual selection to population adaptation [4,5] and divergence [6].

Experimental separation of sexual selection before and after mating within an adaptive framework has proved extremely challenging. Previous studies have taken the approach of Arnold and Wade [7] to partition the variance in total reproductive success into the variance in mating success and the variance in fertilization success [reviewed in 8]. These studies have inferred mixed results as to opportunity for sexual selection. Several studies suggest that the variance in mating success comprises greater than 95% of the total variance in reproductive success [9,10], while others indicate a greater contribution of the post-insemination phase [11-15]. Additionally, evolutionary analyses of seminal fluid proteins show a high opportunity for post-insemination selection [16,17]. While informative, the opportunity for sexual selection does not necessarily translate into realized selection, which contributes to the lack of consistent patterns between studies. Moreover, this framework is an indirect approach for partitioning reproductive success and thus lacks the ability to connect the action of selection to the underlying genomic response to understand how reproductive success is evolving.

*Caenorhabditis elegans* is an ideal system for disentangling mating interactions. First, the mating system in *C. elegans* can be manipulated to prevent hermaphrodite self-sperm production and create functional females that rely on male-female mating. Males in these populations have low reproductive success relative to males from obligate outcrossing *Caenorhabditis* species [18], which creates a high opportunity for the evolution of reproductive success. Second, we have developed an external, non-toxic sterility system for *C. elegans* [19] that capitalizes on the auxin-inducible degron system to degrade the critical spermatogenesis gene *spe-44* and effectively turn off sperm production. The induction of sterility allows for sperm competitive dynamics to be isolated from male-male competitive dynamics for thousands of worms at a time. Finally, *C. elegans* is amenable to the evolve and re-sequence experimental approach [20,21], which allows us to not only quantify the impact of sexual selection on reproductive success, but also identify the underlying genetic structure of the traits involved.

Here we capitalize on transgenics to isolate the contributions of pre-insemination mating competition versus post-insemination sperm competition to the evolution of reproductive fitness of a newly derived *C. elegans* male population. We first create an obligate outcrossing *C. elegans* population composed of functional females and males with inducible sterility. We then performed 30 generations of replicated experimental evolution using a factorial design that partitions sexual selection due to within-strain and between-strain competitive dynamics occurring during pre-insemination and post-insemination. This experiment explicitly tests if pre-insemination sexual selection and post-insemination sexual selection contribute to reproductive success in an additive, synergistic, or antagonistic manner. If pre- and post-insemination selection are additive or synergistic, then we expect to see the greatest increase in total reproductive success when competition is enhanced through the addition of external male competitors during both reproductive stages. Alternatively, if these phases are antagonistic such that competition is beneficial during one stage but detrimental during the other, then we expect to see a reduction in total reproductive success when competition is enhanced during both reproductive stages. We can infer the source of antagonistic competition by comparing-and-contrasting the effects of enhanced and reduced post-insemination competition.

## Results

### Factorial framework to isolate selection on mating and fertilization success

We designed an experimental evolution framework that controls pre- and post-insemination competitive interactions using three distinct and powerful genetic manipulations: a mutation in the sex determination pathway (*fog-2*) to disrupt self-sperm production in hermaphrodites and maintain obligate male-female mating [18], targeted degradation of a key spermatogenesis protein (*spe-44*) to control male mating duration [19], and an inducible lethal marker (*peel-1*) to eliminate offspring from competitor males [22]. To generate a selective event, male sterility was induced after an initial mating period (Fig 1). Increased sperm competition was then generated by adding competitor males from a different strain. After a 24 hour competitive phase, progeny were collected, hatched, and then heat-shocked to induce lethality of the competitor male cross-progeny, leaving only those progeny from the evolving males to start the next generation. This

design isolates sperm competitive success from male mating success and selects for sperm defensive capability and longevity.

The induction of sterility and addition of competitor males generated a factorial experimental design resulting in four experimental evolution regimes (Fig 2A). When both sterility was introduced and competitors subsequently added (between-strain post-insemination only competition, BS-PO), there was increased sexual selection on post-insemination fertilization dynamics. Alternatively, when only sterility was induced, and competitor males not added (within-strain post-insemination only competition, WS-PO), evolving males experienced reduced sperm competition and potentially decreased post-insemination sexual selection. To represent the full degree of sexual selection acting on pre- and post-insemination competition (between-strain pre- and post-insemination competition, BS-P&P), sterility was not induced, but competitor males were added. Finally, no direct sexual selection was applied when neither sterility was induced nor competitors added (within-strain pre- and post-insemination competition, WS-P&P). The WS-P&P regime represents the base level of sexual selection experienced by recently derived *C. elegans* males.

## Opportunity for selection is high in the ancestral population

We used multiple rounds of low-dose EMS mutagenesis to generate genetic variation in the ancestral population (Fig S1). Based on the mutation rate of EMS per generation [23], at least 937,500 non-exclusive mutations were expected to be segregating in the post-mutagenesis population prior to lab adaptation. We observed 321,929 SNPs segregating in the ancestral population, suggesting strong purifying selection during the pre-experimental evolution lab adaptation period (Fig S1). The ancestral population had a genome-wide mean nucleotide diversity of  $\pi = 0.06$  and the minor allele frequency ranged from 0.004 to 0.5 (Fig S2A-D; File S1). These diversity estimates are higher than those commonly observed in *C. elegans* and are more comparable to the obligate outcrossing species *C. remanei* [24]. The distribution of variants was relatively even across chromosome domains, unlike the characteristic pattern of higher diversity on the chromosome arms when compared to the chromosome center [25-27] (Fig S2C-D; File S2). SNP density, however, reflected this chromosome arm-center pattern: the mean SNP density on chromosome arms was  $\theta_w = 0.004$  and in chromosome centers was  $\theta_w = 0.002$  (Fig S2E-F). Despite the X chromosome having a slightly higher recombination rate in the small chromosome center domain [25] coupled with a greater opportunity for purifying selection in

males, the X did not have the lowest SNP density (mean  $\theta_w = 0.0027$ ) as expected. Instead, chromosome I had a significantly lower mean SNP density (mean  $\theta_w = 0.0012$ ;  $t = -67$ ,  $p < 0.001$ ) than the other chromosomes. Together these summary statistics indicate that the ancestral population had more segregating genetic variants than is commonly observed in *C. elegans*, though much of this diversity is not in the gene dense chromosome centers.

We quantified ancestral reproductive success under highly competitive conditions occurring during both pre- and post-insemination (i.e., total reproductive success) and during post-insemination alone using a novel male competitor (Fig 2B). Total reproductive success was slightly, though significantly, poorer than the null expectation of equal competitive ability between ancestral male and competitor male backgrounds (proportions test:  $\chi^2 = 6.87$ , d.f. = 1,  $p < 0.01$ , 95% C.I. of ancestral competitive success = 40.4–48.6%). Ancestral male sperm competitive ability was especially poor with an average of 4.1% of progeny coming from ancestral males relative to the competitor (proportions test:  $\chi^2 = 863$ , d.f. = 1,  $p < 0.0001$ , 95% C.I. of ancestral sperm competitive success = 3.0–5.5%). Therefore, in the ancestral population post-insemination success only contributed 9.2% to the overall reproductive success of males (Fig 2C). The poor reproductive success of ancestral males under competitive conditions indicates the opportunity for selection – particularly gametic selection – to improve male competitive ability was high.

## Post-insemination selection drove evolutionary change in males

We quantified total reproductive success for each replicate population after 10 selective events occurring over 30 generations of evolution under the same highly competitive conditions used to assay the ancestral males. The contribution of post-insemination increased across all evolved replicates relative to the ancestor, such that on average post-insemination success contributed 26.7% to 34.7% of total male reproductive success (Fig 2C). The BS-P&P and WS-PO regimes trended towards a higher fraction of total reproductive success that could be attributed to post-insemination success across replicate means, suggesting that enhanced post-insemination competition positively affects fertilization success. Interestingly, post-insemination contribution increased to 79.7% in a single BS-P&P replicate. This evolutionary increase was due to a 13-fold increase in post-insemination success and only a 1.4-fold increase in total reproductive success.

Overall, the increased contribution of post-insemination dynamics was driven by the significant increase in post-insemination reproductive success of evolved males compared to

ancestral males (Fig 2D; WS-P&P:  $z$ -value = 3.7,  $p < 0.001$ ; BS-P&P:  $z$ -value = 3.6,  $p = 0.001$ ; WS-PO:  $z$ -value = 3.4,  $p = 0.002$ ; BS-PO:  $z$ -value = 4.0,  $p < 0.001$ ). Once again, the BS-PO regime showed the strongest evolutionary response with a 6.8-fold increase from the ancestor, which supports the hypothesis that enhanced post-insemination competition increases the efficacy of sexual selection. Additionally, the WS-PO regime – the regime with the lowest levels of post-insemination competition – comparatively showed the lowest mean evolutionary change from the ancestor, though overall the evolutionary response was still strong. However, a post hoc test to determine if experimental evolution under directed sexual selection increased the rate at which post-insemination evolved relative to the WS-P&P baseline conditions showed no significant difference between regimes, suggesting a strong underlying selective pressure on sperm competitive ability.

Total reproductive success of evolved males compared to ancestral males also increased significantly across regimes (WS-P&P:  $z$ -value = 4.7,  $p < 0.001$ ; BS-P&P:  $z$ -value = 2.7,  $p = 0.02$ ; WS-PO:  $z$ -value = 3.5,  $p < 0.001$ ; BS-PO:  $z$ -value = 3.6,  $p < 0.001$ ), though to a lesser extent than post-insemination success alone (Fig 2D). Interestingly, only the BS-P&P regime showed a significant effect of sexual selection ( $z = -3.6$ ,  $p < 0.001$ ) compared to the baseline WS-P&P regime. Contrary to expectation [5,28], enhanced pre-insemination competition reduced the evolutionary response in male reproductive success. The WS-PO and BS-PO were not significantly different from the baseline. Thus, increasing the opportunity for pre-insemination sexual selection did not lead to faster evolution. Rather, enhanced pre-insemination competition appeared to hinder the rate of evolution of male reproductive success.

## Effective population size reflects strong selection

The effective population size ( $N_e$ ) ranged from 16% to 24% of the census size ( $N = 5,000$ ) across all replicates and regimes (Fig S3; File S3). Regimes where post-insemination interactions were isolated had on average lower effective population sizes across all chromosomes than the WS-P&P and BS-P&P regimes. However, there was no significant effect of regime on  $N_e$  (ANOVA:  $F = 0.72$ , d.f. = 3,  $p = 0.54$ ). Variance in reproductive success impacts  $N_e$ , especially when the sex ratio of breeding individuals is skewed. We calculated the upper bound on the number of breeding males [29], under the assumption that all females reproduced and the reduction in population size was due to variance in male reproductive success alone. For the estimated  $N_e$

range, this analysis suggests that only 222-333 males reproduced (8.9-13.3% of the census male population), supporting strong sexual selection acted on males.

Given the XX/XO chromosomal sex determination system of *C. elegans*, we expected the estimated effective population size of the X chromosome to be approximately 75% of the estimated effective population size of the autosomes. The effective population size was significantly different between the autosomes and sex chromosome ( $t = 3.34$ , d.f. = 24.5,  $p < 0.01$ ). However, contrary to expectation, the mean effective population size estimated using X chromosome SNPs was 1.9 times larger than that estimated using autosomal SNPs.

## **Sperm competitive ability is a polygenic trait**

We fit two complementary models to determine if the frequency of alleles at each SNP changed from the ancestral population to the evolved population in each regime. Model 1 used a post hoc approach to compare SNP counts in the evolved and ancestral populations (Model 1:  $\text{glm}(\text{SNP} \sim \text{regime})$ , linear hypothesis test:  $\text{Anc} - \text{Evolved}_{\text{regime}} = 0$ ) and identified 3,461 significant SNPs after a Bonferroni correction ( $p < 7.43\text{e-}6$ ). The significance trends of Model 1 (File S4) support the more robust findings of Model 2 (File S5). Here we fit independent models for each regime that included sampling at two intermediate generations (Model 2:  $\text{glm}(\text{SNP}_{\text{regime}} \sim \text{time})$ ). In Model 2, we identified 160 non-overlapping significance peaks across the five autosomes and the X chromosome, indicating that male reproductive success is polygenic (Fig 3, File S6). Significance peaks showed a strong chromosome arm-center structure, likely driven by the higher density of SNPs on the chromosome arms (Fig S2). Thirty-one peaks were shared across all regimes (Fig 3, Fig S4). The BS-PO regime had the highest number of significant SNPs ( $n = 1,994$ ) as well as the highest number of unique significance peaks ( $n = 32$ ). The WS-PO regime and the shared WS-PO and BS-PO regimes represent the third and fourth highest groupings, reinforcing that isolated gametic sexual selection resulted in a strong polygenic genomic response (Fig S4). The WS-P&P regime had the fewest number of significance peaks and only three peaks were unique to this regime.

Linkage disequilibrium was low between SNPs and significance peaks could be narrowed down to small genomic regions (File S6). The median peak width was 362.5 base pairs. The largest peak spanned a 10,753 base pair region on the right arm of Chromosome I and lies in the intron of gene C17H1.2 (Fig S5). This gene exhibits male-biased expression, though its function is uncharacterized [30]. The majority of significance peaks ( $n = 108$ ) fell within a genic region,

while 26 peaks were intergenic (File S6). Twenty-three peaks were located in pseudogenes and an additional three peaks overlapped with coding genes and pseudogenes.

To determine the functional pathways underlying improved male reproductive success, we examined the gene ontology (GO) terms associated with the genes underlying significance peaks (Fig S6; File S6). The most common molecular function identified was SCF ubiquitin ligase complex formation through F-box proteins ( $n = 16$ ). Several genes were also related to each carbohydrate binding, G-coupled protein receptor activity, and transferase transporter activity. Six genes were associated with some form of RNA. However, 47.5% of genes were uncharacterized in function, identifying a lack of male-specific functional knowledge.

## Discussion

Quantifying the balance of pre- and post-insemination selection is critical for understanding how male reproductive fitness is comprised and how reproductive success evolves. This knowledge translates to better understanding how sexual selection contributes to population adaptation. We took a direct approach to isolate post-insemination from pre-insemination dynamics by coupling transgenic induction systems within an experimental evolution framework to examine whether these reproductive phases contribute in an additive or antagonistic manner to male reproductive fitness. All treatments showed a strong, rapid response to selection at both the phenotypic and genomic levels (Fig 2 and 3). Phenotypic results indicate that post-insemination selection was the major driver of male evolution. Genomic results support the importance of post-insemination selection and suggest that selection during this phase increased the efficacy of selection. Additionally, reproductive success is a highly polygenic trait with genes on all chromosomes contributing to the response to selection. These results provide new insights on the complexity of post-insemination dynamics and highlight the importance of considering all phases of reproduction.

The balance between pre- and post-insemination selection was complex and depended on the strength of selection imposed. At the phenotypic level, the within-strain competition treatments suggest that pre- and post-insemination act in an additive manner to increase male reproductive fitness (Fig 2). However, this pattern does not hold under enhanced between-strain competitive conditions. Instead, contrary to expectation, increased male-male competition (BS-P&P) decreased the rate of adaptation relative to base levels (WS-P&P). These increased

competitive interactions could potentially harm females as a byproduct (i.e., sexual conflict) and therefore reduce female reproductive rate. However, the BS-PO treatment had the same number of males attempting to mate with females as the BS-P&P, the difference being that the BS-PO males could not transfer sperm post-mating. Thus, the increased number of males actually inseminating females is likely the contributing source of the decreased evolutionary response. While it seems possible that increased competition among sperm led to the decrease in fecundity [31], it is also possible that females altered egg-laying rates in response to the amount of sperm present as a result of a resource trade-off between reproductive and maintenance functions. To our knowledge, no studies have quantified this relationship in nematodes.

In contrast, increased sperm competition appeared to improve the rate of adaptation in males. BS-PO males trended towards the highest rate of increase in post-insemination success and post-insemination contributed the most to their overall reproductive response. While these comparative trends were not significant at the phenotypic level, at the genomic level populations evolved under increased sperm competition had the strongest genomic response across dozens of genes (Fig 3 and S4). Interestingly, populations evolved under reduced sperm competitive dynamics (WS-PO) also showed a strong genomic response, suggesting that isolating post-insemination dynamics from pre-insemination dynamics allowed sexual selection to act more efficiently. While we isolated post-insemination through transgenic induction, this type of effect could be seen in nature if females were to mate with males over distinct periods of time and store sperm for later use.

Our method of population construction generated little haplotype structure, which allowed us to map genetic elements that responded to selection with high precision. A challenge in many quantitative trait loci [32] and evolve-and-resequence studies [33] is narrowing down the regions of selection to make specific statements on the genetic architecture of traits. In contrast, here we have high confidence that reproductive success and sperm competitive success are complex traits underlain by over 60 genes (Fig 3 and S4). In most cases, we were able to narrow the region under selection to just a few hundred base pairs. While this precision should in principle allow us to identify the causal basis of the genetic response, given the highly polygenic structure of these complex traits, each contributing gene likely contributes a small effect, which makes the next step of functional molecular characterization challenging. To help prioritize this process, we performed a GO analysis to look for patterns in molecular functions or biological

processes (Fig S6). F-box proteins involved in protein-protein interactions, such as ubiquitin-ligase complex formation [34], showed a strong response in all treatments. Though their exact function is unknown, many of the several hundred *C. elegans* F-box genes show signatures of positive selection in wild isolates, suggesting that selective conditions observed in nature were mimicked in the lab [35]. However, nearly half of the identified genes were uncharacterized in function, despite *C. elegans* being a major model system. These genes represent a candidate list for future molecular studies to characterize the networks underlying male reproductive function. In particular, gene C17H1.2 is of interest for future study as it has a large significance peak falling within the second intron and exhibits male-biased expression patterns.

Sexual selection has a large effect on population size by limiting the number of successfully breeding adults [reviewed in 36]. We estimated the effective population size to be less than one quarter of the enforced census size. If one assumes that nearly all females are mated as an upper bound, this difference suggests that on average approximately 10% of males sired all offspring (Fig S3). This is the very definition of opportunity for sexual selection [7] and is consistent with our conclusion that strong sexual selection acted on these populations even in the base level treatment (WS-P&P). Interestingly, the effective population size of the X chromosome was larger than expected given the XX/XO sex determination system of *Caenorhabditis* nematodes, which would suggest that the effective population size of the X chromosome should be 3/4 that of the autosomes under neutral expectations. The flip in the  $N_e$  ratio between the X and autosomes is further evidence that the response to selection is driven by sexual interactions among males, as the X chromosome is in males 1/3 of the time while autosomes are in males 1/2 the time, and so the autosomes are more susceptible to drift induced by variance in mating success specially among males [36,37]. Interestingly, the X chromosome also had the fewest number of significance peaks, so in addition to the demography of the X chromosome itself, it is also possible that there may be additional reductions in autosomal variation due hitchhiking [36].

Darwin first noted that the existence of elaborate sex-specific traits seemed at odds with regular evolutionary processes, and more than a hundred of years of research has subsequently focused on understanding how sexual selection drives diversity for these traits within and between populations. Our work indicates that the cryptic phenotypes and molecular effects that emerge during post-insemination interactions are equally important in determining fertilization success and likely to be just as genetically complex.

## Materials and methods

### Molecular biology

Guides targeting sequences in the same intergenic regions utilized by the ttTi4348 and ttTi5605 MosSCI sites have been previously described [19,38]. Additional guide sequences were chosen using the Benchling CRISPR design tool, based on the models of Doench *et al.* [39] and Hsu *et al.* [40], and the Sequence Scan for CRISPR tool [41]. Guides were inserted into pDD162 (Addgene #47549) [42] using the Q5 site-directed mutagenesis kit (NEB) or ordered as cr:tracrRNAs from Synthego. A complete list of guide sequences can be found in Table S1.

Repair template plasmids were assembled using the NEBuilder HiFI Kit (NEB) from a combination of restriction digest fragments and PCR products. PCR products were generated using the 2x Q5 PCR Master Mix (NEB) in accordance with manufacturer instructions. Details of plasmid construction can be found in the supplemental methods and Tables S2 and S3. Plasmids were purified using the ZR Plasmid Miniprep kit (Zymo) and all plasmid assembly junctions were confirmed by Sanger sequencing.

### Strain generation

All strains used in this study are listed in Table S4 and depicted schematically in Figure S1. Insertion of transgenes was done by CRISPR/Cas9 using standard methods. Briefly, a mixture of 10ng/μl repair template plasmid, 50ng/μl plasmid encoding CAS9 and the guide RNA and 2.5ng/μl pCFJ421 (Addgene #34876) [43] was injected into the gonad of young adult hermaphrodites. Where hygromycin resistance (HygR) was used as a selectable event, two to three days after injection, hygromycin B (A.G. Scientific, Inc.) was added to the plates at a final concentration of 250μg/ml. Successful insertion was confirmed by PCR and Sanger sequencing.

To generate the male sterility induction strain PX624, *pie-1p::TIR-1* was inserted into the Chromosome I site and a degron tag was added to the native *spe-44* locus of JU2526 as in Kasimatis *et al.* [19] (Fig S1A, C). The majority of exons 2-4 of the native *fog-2* gene were then deleted using the guides and oligonucleotide repair template listed in Table S1 and Table S3. Microinjections and *dpy-10* co-marker screening were done as previously described [19,44]. This strain represents the predecessor for the experimental evolution ancestral population (see “Generating genetic diversity”).

The *hsp-16.4lp::PEEL-1 + rpl-28p::mKate2 + rps-0p::HygR* three gene cassette was inserted into the Chromosome I site of CB4856. Individuals with confirmed inserts were crossed to JK574, containing *fog-2(q71)*, and backcrossed 4 times to CB4856 (Fig S1B). A single pair was then chosen for 14 generations of inbreeding to create strain PX626. To introduce a second copy of *hsp-16.4lp::PEEL-1*, a *hsp-16.4lp::PEEL-1 + loxP::rps-0p::HygR::loxP* two gene cassette was inserted into the Chromosome II site (Fig S1). The HygR gene was then removed by injection of a CRE expressing plasmid pZCS23 [45] at 10ng/μl, with removal monitored by PCR, to generate PX630. PX626 was crossed to PX630 to generate the final novel, bioassay competitor strain PX631 (Fig S1E).

To generate a lethality and male sterility induction strain, PX624 was crossed with PX631 and then backcrossed 5 times with PX624 to introgress *hsp-16.4lp::PEEL-1* in the Chromosome II site to create strain PX655. Since the Chromosome I site of PX624 is occupied by *pie-1p::TIR-1*, CRISPR/Cas9 was used to insert the *hsp-16.4lp::PEEL-1 + rpl-28p::mKate2 + rps-0p::HygR* three gene cassette into PX624 at a site on Chromosome III between *nac-3* and K08E5.5 that has not been previously used for transgene insertion, creating PX656. PX655 and PX656 were then crossed to create the final competitor strain PX658 (Fig S1D).

## Generating genetic diversity

The male sterility induction strain (PX624) was exposed to ethyl methanesulfonate (EMS) to induce genetic variation (Fig S1). Populations of 8,000-10,000 age-synchronized L4 worms were divided into 4 technical replicates and suspended in M9 buffer. Worms were incubated in 12.5 mM EMS for 4 hours at 20°C, after which they were rinsed in M9 buffer and plated on NGM-agar plates. Replicate populations were given two recovery and growth generations with ample food following a mutagenesis event. A total of five low-dose mutagenesis rounds coupled with recovery generations were performed. During each of the recovery rounds, a subset of worms from each replicate were screened on NGM-agar plates containing 1 mM indole-3-acetic acid (Auxin, Alfa Aesar) following Kasimatis *et al.* [19] to test if mutagenesis had compromised the integrity of the sterility induction system. Specifically, if eggs were observed on an auxin-containing plate, then that replicate was removed and another replicate was subdivided, so a total of four replicate populations were always maintained.

After the final round of mutagenesis and recovery, replicate populations were maintained for five generations of lab adaptation. They were then combined for an additional 10 generations

of lab adaptation with a population size of approximately 30,000 worms. The integrity of the sterility induction system continued to be screened every two generations throughout the entire lab adaptation process. This genetically diverse, male sterility induction strain PX632 represents the ancestral experimental evolution population (Fig S1).

## Experimental design and worm culture

The ancestral population (PX632) was divided into four experimental regimes, which varied based on total (i.e., pre- and post-insemination) or sperm (i.e., post-insemination) competition dynamics occurring either within the evolving strain alone or between the evolving strain and competitor strain (PX658): within-strain pre- and post-insemination competition (WS-P&P), within-strain post-insemination only competition (WS-PO), between-strain pre- and post-insemination competition (BS-P&P), and between-strain post-insemination only competition (BS-PO).

Each regime had six replicate populations and experimentally evolved for 30 generations. Ten selective events occurred over the course of experimental evolution denoted by the induction of sterility, the addition of competitors, and the induction of sterility and addition of competitors in the WS-PO, BS-P&P, and BS-PO regimes, respectively (Fig 1 & Fig 2A). The WS-P&P had no direct selection applied. Each selective event was followed by a recovery generation, where no direct selection was applied, to allow the populations to return to the census size. During the recovery generation, a subset of worms from the regimes with sterility induction were screened on auxin-containing plates to ensure the sterility induction system was functional. Additionally, a subset of worms from all replicates was frozen for future stocks. The detailed selection procedure follows.

To start each selective event age synchronized L1 worms were plated onto five 10 cm NGM-agar plates seeded with OP50 *Escherichia coli* at 20°C with a density of 1,000 worms per plate, giving a census size of 5,000 worms per replicate per regime [46,47]. Forty-eight hours later, experimental regimes with sterility induction (WS-PO and BS-PO) were transferred to NGM-agar plates containing 1mM auxin. Experimental regimes without sterility induction (WS-P&P and BS-P&P) were transferred to fresh NGM-agar plates. For all transfers, worms within a replicate were pooled and then redistributed across five plates with a density of 1,000 worms per plate. After 24 hours, males from the competitor strain PX658 were filter-separated from females using a 35 um Nitex nylon filter and added to experimental regimes with competition at a mean

density of 200 competitor males per plate (evolving to competitor ratio of 1:2.5). After another 24 hours, eggs were collected from all replicates, hatched, and age synchronized. To ensure that only progeny from the evolving males and not from the competitor males were being propagated, larval lethality of competitor progeny was induced following Seidel *et al.* [22]. Briefly, approximately 5,000 L3 worms were suspended in 5 mL of S-Basal and heat-shocked in a 35°C sealed water bath for 2.5 hours to activate ectopic expression of the lethal protein PEEL-1. After heat-shock, worms were plated on NGM-agar plates to end the selective event. All experimental regimes were subjected to the heat-shock procedure, even if competitor worms were not added.

A subset of approximately 200 worms from the competition and sterility and competition regimes were removed prior to heat-shock and fluorescence screened to determine the proportion of progeny coming from the competitor worms, which expressed red fluorescent protein (RFP), versus the evolving worms, which had no fluorescence.

The competitor strain PX658 was maintained on NGM-agar plates seeded with OP50 *E. coli* at 20°C in population sizes of approximately 20,000 worms. The competitor strain was reset from freezer stocks every 3 weeks (~4 generations) to prevent adaptation and maintain a constant competitive phenotype.

## Fertility assays

We assayed the fertility of the ancestor and all the evolved replicates (N = 13 populations) to determine the total competitive reproductive success of males as well as their sperm competitive success. The assay conditions mimicked the environment under which worms evolved. Total competitive reproductive success was assessed by adding the novel competitor PX631 in equal proportion to evolving males. Sperm competitive success was assessed by inducing sterility of the evolving male before adding the novel competitor in equal proportion to evolving males. The use of the novel competitor and high competition ratio acted as a “stress-test” of male competitive ability. Both assays were performed with a population of 250 evolving females, 250 evolving males, and 250 novel competitors. After a 24-hour competition period, eggs were collected, hatched, and age synchronized for screening. At least 200 L3 progeny were counted for each assay and then fluorescence-screened for the proportion of progeny coming from evolving (RFP minus) or competitor (RFP plus) males. Three independent biological replicates were done for each assay across all experimental evolution replicates (File S7).

Fertility data were analyzed using the R statistical language v4.0.0 [48]. An equality of proportions test was performed on the ancestral data to determine if ancestral males sired half the total progeny under total competitive and sperm competitive conditions. The evolved male fertility data were analyzed using a linear model (GLM) framework with random effects using the *lme4* v.1.13 package [49]. The *multcomp* package [50] was then used to perform a planned comparisons tests with defined contrasts to determine if: i) evolutionary change from the ancestral population occurred, and ii) experimental evolution under direct sexual selection affected reproductive success differently than baseline selection alone (i.e., WS-P&P).

## Genome sequencing, mapping, and SNP calling

We performed whole-genome sequencing on pooled samples of 2,000-3,000 L1 worms from generations 0, 13, 22, and 31. Three independent pooled extractions were done for the ancestral population (i.e., generation 0) to capture as many segregating variants as possible. Worms were flash frozen and DNA was isolated using Genomic DNA Clean and Concentrator-10 (Zymo). Libraries were prepared using the Nextera DNA Sample Prep kit (Illumina) starting from 5 ng of DNA. 100 bp paired-end reads were sequenced on an Illumina HiSeq 4000 at the University of Oregon Genomics and Cell Characterization Core Facility (Eugene, OR). The average genome-wide sequencing coverage for generations 0, 13, 22, and 31 was 162×, 24×, 26×, 50×, respectively.

Reads were trimmed using skewer v0.2.2 [51] to remove low quality bases (parameters: -x CTGTCTCTTATA -t 12 -l 30 -r 0.01 -d 0.01 -q 20). The trimmed reads were mapped to the *C. elegans* N2 reference genome (PRJNA13758-WS274) [30] using BWA-MEM v0.7.17 (parameters: -t 8 -M) [52] and then sorted using SAMtools v1.5 [53]. We removed PCR duplicates with MarkDuplicates in Picard v2.6.0 (<https://github.com/broadinstitute/picard>), realigned insertions/deletions with IndelRealigner in GATK v3.7 (<https://github.com/broadinstitute/gatk/#authors>), and called variants with mpileup in bcftools v1.5 [54]. The mpileup file was then converted to a genotype-called vcf file, insertions/deletions were removed, and the allelic depth was extracted for all biallelic SNPs for further analysis.

To improve the reliability of the analysis pipeline, additional filtering was done using R [48]. Repeat regions were masked based the *C. elegans* N2 reference (<https://gist.github.com/danielecook/cfaa5c359d99bcad3200>) and SNPs in the upper and lower

5% tails of the total coverage distribution (i.e.,  $>342\times$  and  $\leq 20\times$ , respectively) were removed. This yielded a total of 326,648 SNPs to be considered for analyses.

## Estimation and candidate SNP inference

Genetic diversity summary statistics were estimated for the ancestral population from 321,929 SNPs. Coverage-weighted average heterozygosity ( $\pi$ ) was calculated following Begun et al. [55]. SNP density ( $\theta_w$ ) was calculated across 1kb sliding windows. We performed a Kolmogorov-Smirnov test to determine if the site frequency spectrum,  $\pi$ , and  $\theta_w$  differed between chromosome arm domains and center domains [25]. Effective population size ( $N_e$ ) was calculated per chromosome for each of the evolved regime replicates following Waples [56] Plan II sampling [57]. An analysis of variance was performed in R to determine if the genome-wide  $N_e$  differed between regimes and Welch's Two-Sample t-test was performed to determine if the estimated  $N_e$  on autosomes differed from the X chromosome. We estimated the upper bound on the number of breeding males ( $N_m$ ) by solving the equation  $N_e = (4 N_m N_f) / (N_m + N_f)$  for  $N_m$  using the estimated effective population sizes and assuming that all females reproduced ( $N_f = 2,500$ ).

Allele count data were analyzed using R [48] following two complementary models. Model 1 fit allele counts for ancestral and evolved populations using a generalized linear mixed model with a binomial logistic distribution:  $\text{glm}(\text{SNP} \sim \text{regime})$ . The SNP data going into Model 1 were filtered to ensure each SNP was present in the ancestor and at least ten of the evolved replicates. A total of 263,373 SNPs fit the full model (File S4). The *multcomp* package [50] was then used to perform a planned comparisons tests with defined contrasts to determine if experimental evolution under direct sexual selection affects the genome differently than baseline selection alone (i.e., WS-P&P). Model 2 fit allele counts across all time points for each regime separately, again using a generalized linear mixed model with a binomial logistic distribution:  $\text{glm}(\text{SNP}_{\text{regime}} \sim \text{time})$ . The SNP data going into Model 2 were filtered to ensure each SNP was present in the ancestor and at least nine occurrences across replicates and time points. A total of 202,926 SNPs, 222,731 SNPs, 200,324 SNPs, and 204,946 SNPs fit the full model for the WS-P&P, WS-PO, BS-P&P, and BS-PO regimes, respectively (File S5). For both models, significance was determined using a genome-wide Bonferroni cut-off.

A significance peak was called if five or more significant SNPs fell in a 1kb window. Peaks were classified as occurring within a gene (intragenic) or between genes (intergenic) using

JBrowse in WormBase [30]. If multiple 1kb windows fell within a single gene, then the windows were combined and called as a single intragenic peak. The molecular and biological functions of the associated genes were determined using gene ontology analysis in UniProt [58] and QuickGO [59].

## **Data accessibility**

The oligonucleotides and synthetic constructs used in this study are available in Tables S1-S3. The fertility data are available in File S7. The sequence data will be made publicly available on NCBI prior to publication. Model summary statistics for the genomic analyses are available in Files S1-S6. All R scripts are available via the GitHub public repository [https://github.com/katjakasimatis/postinsemination\\_expevol](https://github.com/katjakasimatis/postinsemination_expevol). Worm strains PX624, PX631, and PX658 will be made available from the *Caenorhabditis* Genetics Center. All other strains are available from the Phillips Lab upon request.

## **Acknowledgements**

We thank Brennen Jamison, Erik Johnson, and Christine Sedore for assistance during experimental evolution and Anastasia Teterina for advice on the genomic analyses. We thank Levi Morran, Bill Rice, Locke Rowe, and the Phillips lab for their helpful discussion. This work was conducted in part using the resources of the University of Oregon Genomics and Cell Characterization Core Facility and Research Advanced Computing Services.

## **Funding**

This work was funded by NIH grant R35GM131838 to PCP. KRK is supported by a NSERC Banting Postdoctoral Fellowship.

## Author contributions

KRK and PCP devised the project. KRK and MJMS created the strains. KRK collected the experimental evolution data with assistance from RL and AS. JHW prepared the genomic libraries. KRK analyzed the data. KRK and PCP wrote the manuscript with the support of the other authors.

## References

1. Andersson M. Sexual Selection. New York: Princeton University Press; 1994.
2. Lewontin R. The units of selection. *Annu Rev Ecol Syst.* 1970;1: 1–18.
3. Immler S, Otto SP. The Evolutionary Consequences of Selection at the Haploid Gametic Stage. *Am Nat.* 2018;192: 241–249.
4. Lorch PD, Stephen Proulx, Rowe L, Day T. Condition-dependent sexual selection can accelerate adaptation. *Evol Ecol Res.* 2003;5: 867–881.
5. Candolin U, Heuschele J. Is sexual selection beneficial during adaptation to environmental change? *Trends Ecol Evol.* 2008;23: 446–452.
6. Lande R. Models of speciation by sexual selection on polygenic traits. *Proc Natl Acad Sci USA.* 1981;78: 3721–3725.
7. Arnold SJ, Wade MJ. On the measurement of natural and sexual selection: theory. *Evolution.* 1984;38: 709–719.
8. Evans JP, Garcia-Gonzalez F. The total opportunity for sexual selection and the integration of pre- and post-mating episodes of sexual selection in a complex world. *J Evol Biol.* 2016;29: 2338–2361.
9. Pischedda A, Rice WR. Partitioning sexual selection into its mating success and fertilization success components. *Proc Natl Acad Sci USA.* 2012;109: 2049–2053.
10. Rose E, Paczolt KA, Jones AG. The contributions of premating and postmating selection episodes to total selection in sex-role-reversed Gulf pipefish. *Am Nat.* 2013;182: 410–420.
11. Marie-Orleach L, Janicke T, Vizoso DB, David P, Schärer L. Quantifying episodes of sexual selection: Insights from a transparent worm with fluorescent sperm. *Evolution.* 2016;70: 314–328.

- 568 12. Devigili A, Evans JP, Di Nisio A, Pilastro A. Multivariate selection drives concordant  
569 patterns of pre- and postcopulatory sexual selection in a livebearing fish. *Nat Commun.*  
570 2015;6: 1–9.
- 571 13. Collet J, Richardson DS, Worley K, Pizzari T. Sexual selection and the differential effect  
572 of polyandry. *Proc Natl Acad Sci USA.* 2012;109: 8641–8645.
- 573 14. Turnell BR, Shaw KL. High opportunity for postcopulatory sexual selection under field  
574 conditions. *Evolution.* 2015;69: 2094–2104.
- 575 15. Péliissié B, Jarne P, Sarda V, David P. Disentangling precopulatory and postcopulatory  
576 sexual selection in polyandrous species. *Evolution.* 2014;68: 1320–1331.
- 577 16. Begun DJ, Whitley P, Todd BL, Waldrip-Dail HM, Clark AG. Molecular population  
578 genetics of male accessory gland proteins in *Drosophila*. *Genetics.* 2000;156: 1879–1888.
- 579 17. Swanson WJ, Vacquier VD. Reproductive Protein Evolution. *Annu Rev Ecol Syst.*  
580 2002;33: 161–179.
- 581 18. Stewart AD, Phillips PC. Selection and maintenance of androdioecy in *Caenorhabditis*  
582 *elegans*. *Genetics.* 2002;160: 975–982.
- 583 19. Kasimatis KR, Moerdyk-Schauwecker MJ, Phillips PC. Auxin-mediated sterility  
584 induction system for longevity and mating studies in *Caenorhabditis elegans*. *G3.* 2018;8:  
585 2655–2662.
- 586 20. Schlötterer C, Kofler R, Versace E, Tobler R, Franssen SU. Combining experimental  
587 evolution with next-generation sequencing: a powerful tool to study adaptation from  
588 standing genetic variation. *Heredity.* 2015;114: 431–440.
- 589 21. Teotonio H, Estes S, Phillips PC, Baer CF. Experimental Evolution with *Caenorhabditis*  
590 *Nematodes*. *Genetics.* 2017;206: 691–716.
- 591 22. Seidel HS, Ailion M, Li J, van Oudenaarden A, Rockman MV, Kruglyak L. A novel  
592 sperm-delivered toxin causes late-stage embryo lethality and transmission ratio distortion  
593 in *C. elegans*. *PLoS Biol.* 2011;9: e1001115–21.
- 594 23. Gengyo-Ando K, Mitani S. Characterization of mutations induced by ethyl  
595 methanesulfonate, UV, and trimethylpsoralen in the nematode *Caenorhabditis elegans*.  
596 *Biochem Biophys Res Commun.* 2000;269: 64–69.
- 597 24. Cutter AD, Baird SE, Charlesworth D. High nucleotide polymorphism and rapid decay of  
598 linkage disequilibrium in wild populations of *Caenorhabditis remanei*. *Genetics.*  
599 2006;174: 901–913.
- 600 25. Rockman MV, Kruglyak L. Recombinational Landscape and Population Genomics of  
601 *Caenorhabditis elegans*. *PLoS Genetics.* 2009;5: e1000419–16.

- 602 26. Lee D, Zdraljevic S, Stevens L, Wang Y, Tanny RE, Crombie TA, et al. Balancing  
603 selection maintains ancient genetic diversity in *C. elegans*. bioRxiv. 2020: 1–41.  
604 doi:10.1101/2020.07.23.218420
- 605 27. Andersen EC, Gerke JP, Shapiro JA, Crissman JR, Ghosh R, Bloom JS, et al.  
606 Chromosome-scale selective sweeps shape *Caenorhabditis elegans* genomic diversity. Nat  
607 Rev Genet. 2012;44: 285–290.
- 608 28. Lande R. Sexual dimorphism, sexual selection, and adaptation in polygenic characters.  
609 Evol. 1980;34: 292–305.
- 610 29. Crow JF, Kimura M. An introduction to population genetics theory. New York: Harper  
611 and Rowe; 1970.
- 612 30. Harris TW, Arnaboldi V, Cain S, Chan J, Chen WJ, Cho J, et al. WormBase: a modern  
613 Model Organism Information Resource. Nucleic Acids Res. 2019;gkz920.
- 614 31. Holland B, Rice WR. Experimental removal of sexual selection reverses intersexual  
615 antagonistic coevolution and removes a reproductive load. Proc Natl Acad Sci USA.  
616 1999;96: 5083–5088.
- 617 32. Mackay TFC, Stone EA, Ayroles JF. The genetics of quantitative traits: challenges and  
618 prospects. Nat Rev Genet. 2009;10: 565–577.
- 619 33. Otte KA, Nolte V, Mallard F, Schlötterer C. The adaptive architecture is shaped by  
620 population ancestry and not by selection regime. bioRxiv. 2020;1–38.  
621 doi:10.1101/2020.06.25.170878
- 622 34. Kipreos ET, Pagano M. The F-box protein family. Genome Biol. 2000;1: 3002.1–3002.7.
- 623 35. Ma F, Lau CY, Zheng C. Large genetic diversity and strong positive selection in F-box  
624 and GPCR genes among the wild isolates of *Caenorhabditis elegans*. Genome Biol Evol.  
625 2021;13: evab048.
- 626 36. Charlesworth B. Fundamental concepts in genetics: effective population size and patterns  
627 of molecular evolution and variation. Nat Rev Genet. 2009;10: 195–205.
- 628 37. Corl A, Ellegren H. The genomic signature of sexual selection in the genetic diversity of  
629 the sex chromosomes and autosomes. Evol. 2012;66: 2138–2149.
- 630 38. Dickinson DJ, Pani AM, Heppert JK, Higgins CD, 2015. Streamlined genome engineering  
631 with a self-excising drug selection cassette. Genetics. 2015;200: 1035–1049.
- 632 39. Doench JG, Fusi N, Sullender M, Hegde M, Vaimberg EW, Donovan KF, et al. Optimized  
633 sgRNA design to maximize activity and minimize off-target effects of CRISPR-Cas9. Nat  
634 Biotechnol 2016 34:3. 2016;34: 184–191.

- 635 40. Hsu PD, Scott DA, Weinstein JA, Ran FA, Konermann S, Agarwala V, et al. DNA  
636 targeting specificity of RNA-guided Cas9 nucleases. *Nat Biotechnol* 2016 34:3. 2013;31:  
637 827–832.
- 638 41. Xu H, Xiao T, Chen C-H, Li W, Meyer CA, Wu Q, et al. Sequence determinants of  
639 improved CRISPR sgRNA design. *Genome Res.* 2015;25: 1147–1157.
- 640 42. Dickinson DJ, Ward JD, Reiner DJ, Goldstein B. Engineering the *Caenorhabditis elegans*  
641 genome using Cas9-triggered homologous recombination. *Nat Meth.* 2013;10: 1028–  
642 1034.
- 643 43. Frøkjær-Jensen C, Davis MW, Ailion M, Jorgensen EM. Improved Mos1-mediated  
644 transgenesis in *C. elegans*. *Nat Meth.* 2012;9: 117–118.
- 645 44. Paix A, Folkmann A, Rasoloson D, Seydoux G. High efficiency, homology-directed  
646 genome editing in *Caenorhabditis elegans* using CRISPR-Cas9 ribonucleoprotein  
647 complexes. *Genetics.* 2015;201: 47–54.
- 648 45. Stevenson ZC, Moerdyk-Schauwecker MJ, Jamison B, Phillips PC. Rapid self-selecting  
649 and clone-free integration of transgenes into engineered crispr safe harbor locations in  
650 *Caenorhabditis elegans*. *G3.* 2020;10: 3775–3782.
- 651 46. Brenner S. The genetics of *Caenorhabditis elegans*. *Genetics.* 1974;77: 71–94.
- 652 47. Kenyon C. The nematode *Caenorhabditis elegans*. *Science.* 1988;240: 1448–1453.
- 653 48. R Core Team. R: A language and environment for statistical computing [Internet]. Vienna,  
654 Austria: Foundation for Statistical Computing; 2020. Available: [https://www.R-](https://www.R-project.org/)  
655 [project.org/](https://www.R-project.org/)
- 656 49. Bates D, Mächler M, Bolker B, Walker S. Fitting linear mixed-effects models using lme4.  
657 *J Stat Soft.* 2015;67: 1–48.
- 658 50. Hothorn T, Bretz F, Westfall P. Simultaneous inference in general parametric models.  
659 *Biom J.* 2008;50: 346–363.
- 660 51. Jiang H, Lei R, Ding S-W, Zhu S. Skewer: a fast and accurate adapter trimmer for next-  
661 generation sequencing paired-end reads. *BMC Bioinformatics.* 2014;15: 182–12.
- 662 52. Li H. Aligning sequence reads, clone sequences and assembly contigs with BWA-MEM.  
663 *arXiv.* 2013;1303.3997v2: 1–3.
- 664 53. Li H, Handsaker B, Wysoker A, Fennell T, Ruan J, Homer N, et al. The Sequence  
665 Alignment/Map format and SAMtools. *Bioinformatics.* 2009;25: 2078–2079.
- 666 54. Danecek P, Schiffels S, Durbin R. Multiallelic calling model in bcftools (-m). 2016.  
667 Available at: <http://samtools.github.io/bcftools/call-m.pdf>

55. Begun DJ, Holloway AK, Stevens K, Hillier LW, Poh Y-P, Hahn MW, et al. Population genomics: whole-genome analysis of polymorphism and divergence in *Drosophila simulans*. PLoS Biol. 2007;5: e310.
56. Waples RS. A generalized approach for estimating effective population size from temporal changes in allele frequency. Genetics. 1989;121: 379–391.
57. Jónas Á, Taus T, Kosiol C, Schlötterer C, Futschik A. Estimating the effective population size from temporal allele frequency changes in experimental evolution. Genetics. 2016;204: 723–735.
58. UniProt Consortium. UniProt: the universal protein knowledgebase in 2021. Nucleic Acids Res. 2021;49: D480–D489.
59. Huntley RP, Sawford T, Mutowo-Meullenet P, Shypitsyna A, Bonilla C, Martin MJ, et al. The GOA database: gene ontology annotation updates for 2015. Nucleic Acids Res. 2015;43: D1057–63.

## Figures

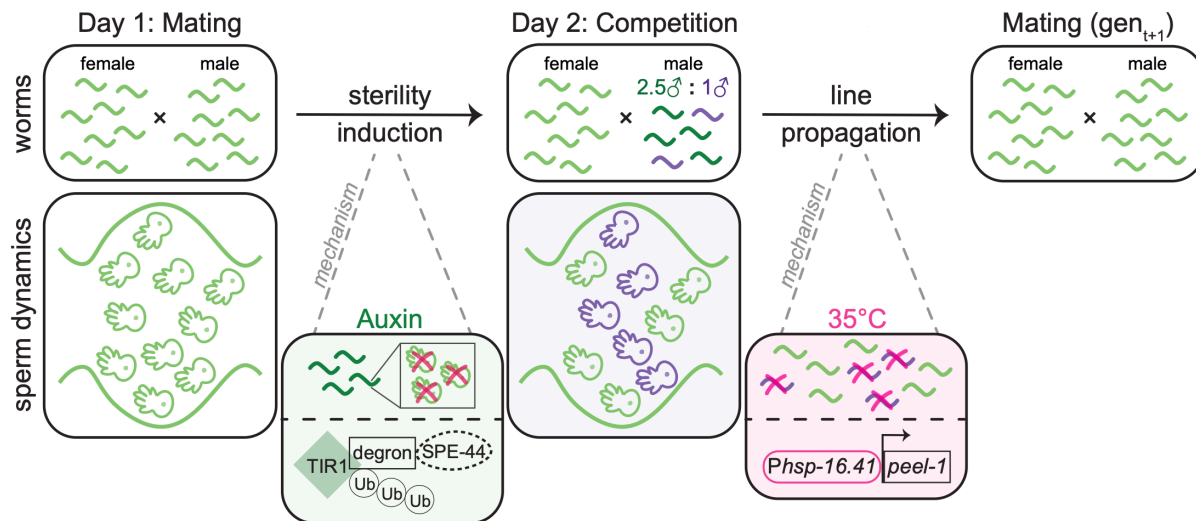

**Fig 1. Day-by-day depiction of the experimental evolution design shown at the population level and at the sperm level.** On day 1 sterility is induced by transferring worms to auxin-containing media. Auxin activates TIR1 to target the degron tag on SPE-44. The depletion of SPE-44 stops the production of sperm thereby inducing sterility. On day 2, competitor males are added to the population at a ratio of 1 competitor male to 2.5 evolving males. Progeny are collected on day 3 and heat-shocked on day 4 to induce ectopic expression of the toxic protein PEEL-1. This expression kills competitor cross-progeny, leaving only the progeny from sperm transferred during the day 1 mating phase. Each selective event is followed by a recovery generation.

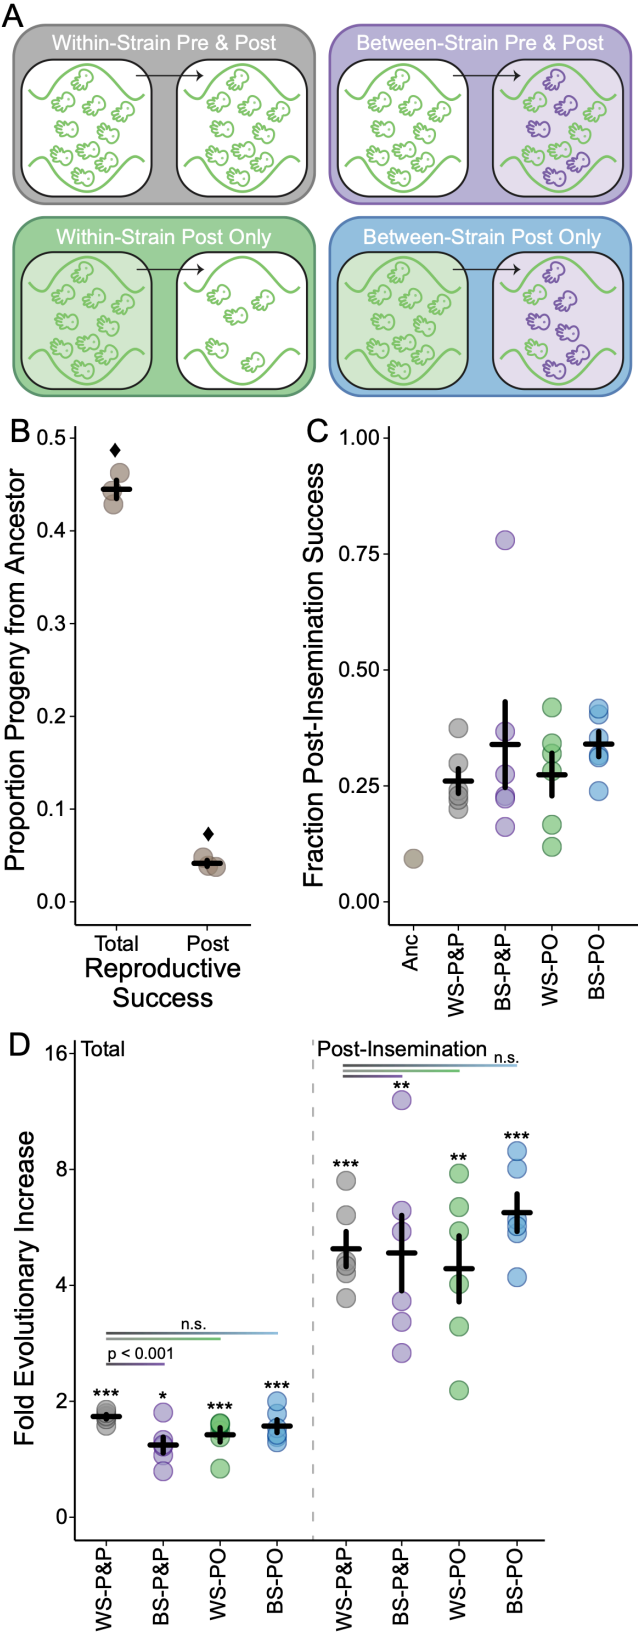

**Fig 2. The competitive reproductive success of males before and after experimental evolution under four sexual selection regimes.** **A)** Partitioning the sterility and competition treatments leads to four experimental evolution regimes: within-strain pre- and post-insemination competition (WS-P&P, gray), within-strain post-insemination only competition (WS-PO, green), between-strain pre- and post-insemination competition (BS-P&P, purple), and between-strain post-insemination only competition (BS-PO, blue). **B)** Ancestral males have poorer reproductive success than competitor males under both pre- and post-insemination competitive conditions (total) and under only post-insemination competitive conditions. Each point represents an independent assay with the mean and standard error across assays given. Diamonds denote a significant deviation from the null hypothesis of equal competitive ability between ancestral and competitive males for each condition (total:  $\chi^2 = 6.87$ , d.f. = 1,  $p < 0.01$ , 95% C.I. of ancestral competitive success = 40.4–48.6%; post-insemination:  $\chi^2 = 863$ , d.f. = 1,  $p < 0.0001$ , 95% C.I. of ancestral sperm competitive success = 3.0–5.5%). **C)** The fraction of total reproductive success attributable to post-insemination success in the ancestral population (Anc) and the evolved populations (WS-P&P, BS-P&P, WS-PO, BS-PO). Each point represents a mean of three independent assays for the ancestor and each evolved replicate with the mean and standard error across evolved replicates shown. **D)** The fold change in the total reproductive success and the post-insemination reproductive success of males in the evolved regimes relative to the ancestor (plotted on a  $\log_2$  scale). Males in all regimes significantly increased in both measures of reproductive success (\* $p < 0.05$ , \*\* $p < 0.01$ , \*\*\* $p < 0.001$ ). Post hoc tests for a difference between the WS-P&P and the BS-P&P, WS-PO, and BS-PO regimes are indicated by the horizontal lines. The only significant difference appears between the total reproductive success of the WS-P&P and BS-P&P regimes, in which pre-insemination competition reduces the evolutionary response. Each point represents a mean of three independent assays for each evolved replicate with the mean and standard error across replicates shown.

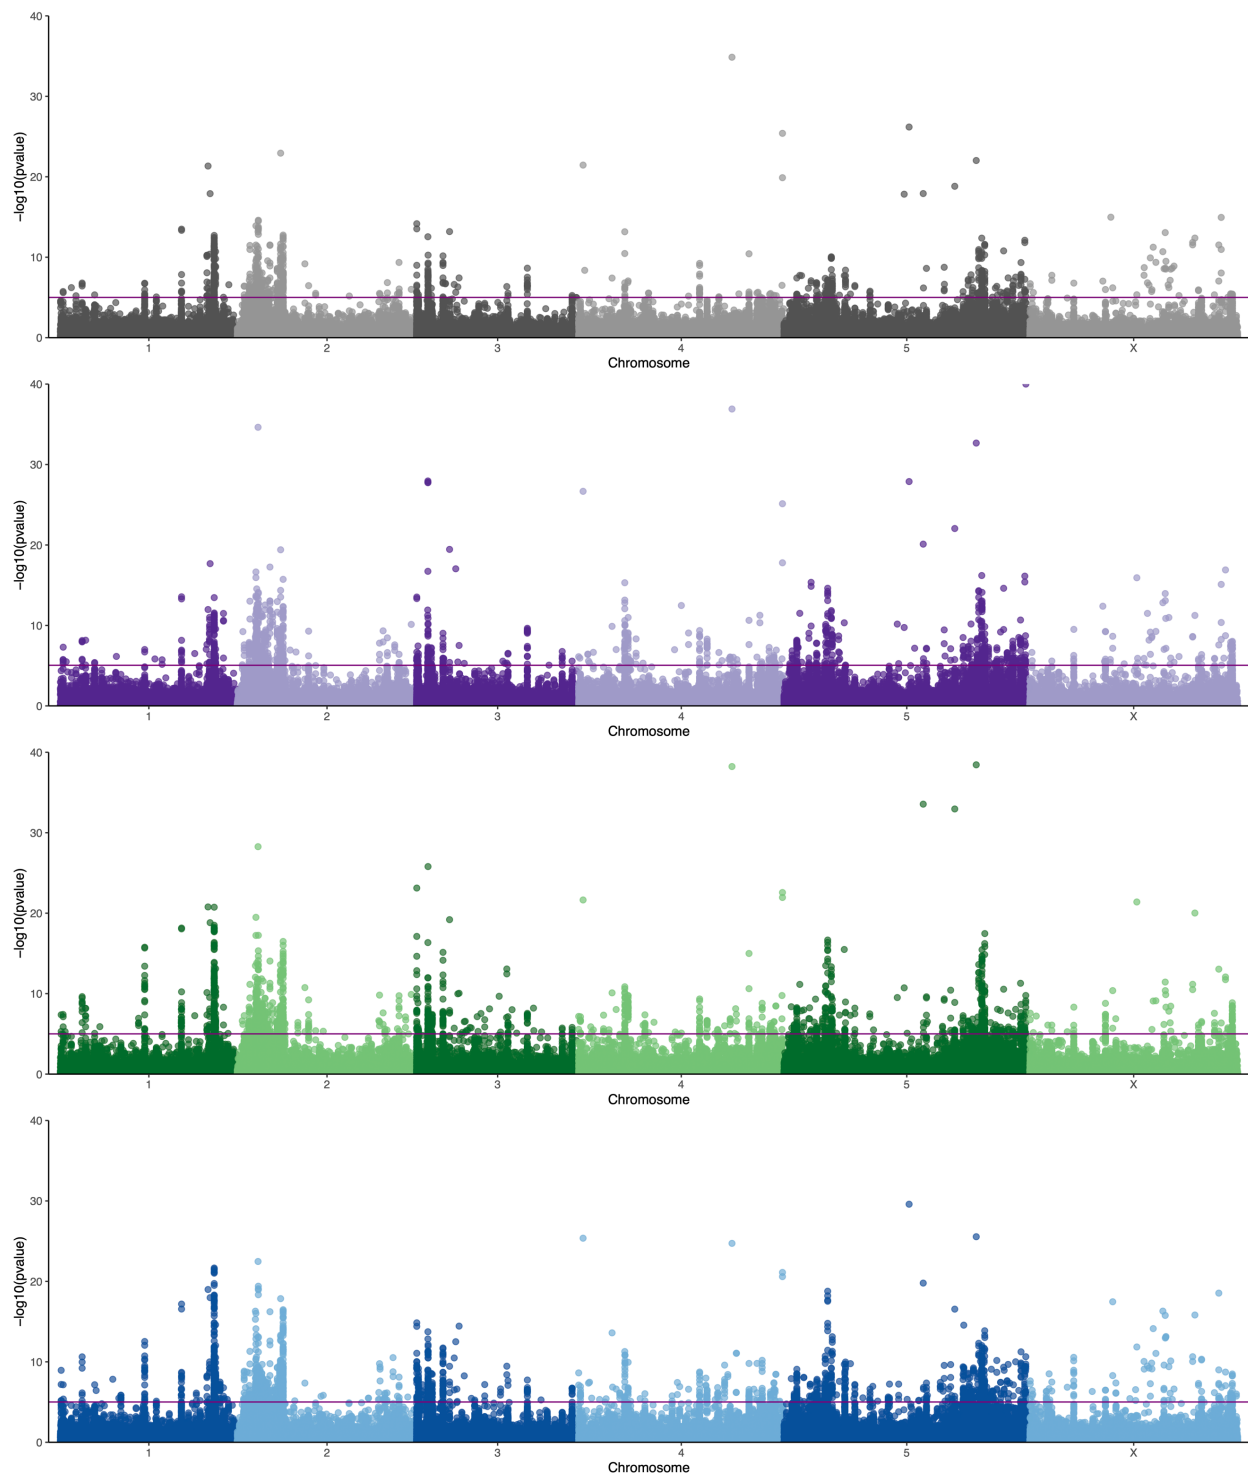

**Fig 3. Genomic response for each SNP over time fit for each regime (Model 2).** The horizontal line represents the Bonferroni significance threshold. Reproductive success is a highly polygenic trait with 49 peaks identified in the WS-P&P regime (gray), 77 in the BS-P&P regime

725 (purple), 102 in the WS-PO regime (green), and 107 in the BS-PO regime (blue). The  
726 distribution of peak overlaps is shown in Figure S3.

## Supporting information

**S1 Fig. Schematic of strain construction.** **A)** The components for creating an obligate outcrossing sterility induction line were genetically engineered in the wild isolate background JU2526. The spermatogenesis gene *spe-44* was degron-tagged and TIR1 was inserted to create strain PX737. The hermaphrodite self-sperm gene (*fog-2*) was knocked-out to create strain PX738. These strains are used in panels C and D. **B)** To generate an inducible lethality line, heat-shock driven *peel-1* was inserted into the CB4856 background on Chromosomes I and II to create strains PX739 and PX630, respectively. These strains are used in panels D and E. **C)** Strains PX737 and PX738 were crossed to creating a male-female, inducible sterility triple mutant (PX624). Strain PX624 went through five low dose rounds of mutagenesis each followed by two recovery generations. After the final recovery generation, the population was expanded for 15 generations of lab adaptation to create the experimental evolution ancestral population (PX632). **D)** The competition strain has five transgenic modifications. Heat-shock driven *peel-1* was inserted on Chromosome III of strain PX737, creating an inducible lethality and inducible sterility strain (PX656). Strains PX624 and PX631 (panel E) were crossed to given another inducible lethality and sterility double mutant. These worms were backcrossed to PX624 five times to give a predominantly JU2526 genomic background. This strain, PX655, was crossed with PX656 yielding a quintuple mutant, which was inbred to three generations followed by five generations of lab adaptation. The final strain PX658 served as the competitor during experimental evolution. **E)** A separate bioassay competitor strain was generated by introgressing the *fog-2*(q71) mutation into PX739. These worms were backcrossed to the CB4856 genomic background four times and then inbred for 14 generations, creating strain PX626. This strain was crossed to PX630 to create an obligate outcrossing strain with two heat-shock driven *peel-1* insertions. The final strain PX631 served as the novel competitor during phenotypic assays.

**S2 Fig. Genetic diversity of the ancestral population.** **A)** The minor allele frequency (MAF) across Chromosome II (as an exemplar). The genome-wide mean is shown in blue. **B)** Histogram of MAF counts across the entire genome binned by chromosome arms and chromosome center. Values of zero are excluded from the plot. **C)** Nucleotide diversity ( $\pi$ ) calculated per SNP across Chromosome II. The genome-wide mean is shown in blue. **D)** Histogram of nucleotide diversity across the entire genome binned by chromosome arms and chromosome center. Values of zero

are excluded from the plot. **E)** SNP density ( $\theta_w$ ) per base pair across Chromosome II. The genome-wide mean is shown in blue. **F)** Histogram of SNP density in 1kb windows across the entire genome binned by chromosome arms and chromosome center.

**S3 Fig. The estimated effective population size ( $N_e$ ) per chromosome for all replicates.** The effective population size was greatly reduced compared to the census size ( $N = 5,000$ ). Regime did not have a significant effect on effective population size ( $F = 0.72$ , d.f. = 3,  $p = 0.54$ ).

**S4 Fig. Breakdown of significance peaks from Model 2.** The counts of significance peaks are shown along with the combination of regimes contributing to that count. Unique peaks are represented by a single black dot for the given regime. Shared peaks have multiple connected black dots. The total number of significant SNPs within each regime is given.

**S5 Fig. Zoom plot of the major significance peak on the right arm of Chromosome I.**

Significant SNPs pile up in the second intron of gene C17H1.2. This gene has male-biased expression, though it's function is uncharacterized.

**S6 Fig. The molecular functions for genes associated with significance peaks based on a GO analysis.** Ubiquitin ligase complex formation through F-box proteins, carbohydrate binding, G-coupled protein receptor activity, and transferase transporter activity were the most common functions identified. However, the majority of genes are yet uncharacterized in function.

**S1 Table. Guide sequences.** The guide sequence, genomic location, target region/gene, and format (plasmid or cr:tracrRNA) are given.

**S2 Table. Plasmid construction.** The plasmid name and insert are given for both plasmids used in construction and as repair templates.

**Table S3. Primers.** The primer name, sequence (in 5' to 3' orientation), and purpose for a given primer are listed.

**Table S4. Strains generated in this study.** Full genotype information for each strain used in this study, along with the genomic background, method of construction, and generations of backcrossing and/or inbreeding.

**S1 File. SNP data for the ancestor.** The chromosome, position (in base pairs), reference allele, alternate allele, counts of reference alleles, counts of alternate alleles, total coverage, minor allele frequency (MAF), chromosome domain, and nucleotide diversity ( $\pi$ ) are given.

**S2 File. Watterson's theta calculated in 1kb windows across each chromosome.** The chromosome, chromosome domain, theta per window, and theta per base pair are given.

**S3 File. Effective population size estimated using Waples Plan II sampling for each replicate and each chromosome.**

**S4 File. Summary statistics for the Model 1 planned comparison analysis of ancestral versus evolved allele counts.** For each SNP, the chromosome and position (in base pairs) is given along with the slope estimate and p-value for each regime comparison.

**S5 File. Summary statistics for the Model 2 GLM analysis of allele counts over time for each regime.** For each SNP within each regime, the chromosome and position (in base pairs) is given along with the model intercept, slope estimate, standard error, z-value, and p-value.

**S6 File. Summary of the significance peaks identified using the Model 2 genomic results.** The chromosome, start position (in base pairs), stop position (in base pairs), presence in each treatment, associated gene, genetic region, molecular function (from GO analysis), and biological function (from GO analysis) are given.

**S7 File. Competitive phenotyping data for the ancestor and all evolved replicates.**
